# Supplementary material
Source: HighWire-hosted journal article supplement (https://dmd.aspetjournals.org/highwire/filestream/76433/field_highwire_adjunct_files/4/125_Supp_table_2.docx)
Supplement: 125_Supp_table_2.docx [file 125_Supp_table_2.docx]

Manuscript number: DMD-AR-2020-000125R2

**Prediction of transporter-mediated drug-drug interactions and phenotyping of hepatobiliary transporters involved in the clearance of E7766, a novel macrocycle-bridged dinucleotide**

Rongrong Jiang*, Andrew Hart1, Laurette Burgess, Dae-Shik Kim, Weidong Lai2, Vaishali Dixit*

*Drug Metabolism and Pharmacokinetics, Eisai Inc, Massachusetts, USA (R.J., V.D., G.L., A.H.) Genetics Guided Dementia Discovery, Eisai Inc, Massachusetts, USA (L.B., DS.K.)*

*1Current Address: Wave Life Sciences, Massachusetts, USA*

*2Current Address: Triplet Therapeutics, Massachusetts, USA*

**Co-corresponding authors*

**Running Title:** Transporter-mediated drug-drug interactions for E7766

**Supplemental Table 2** OATP1B1 and OATP1B3 protein expression levels in human hepatocytes and HEK293FT overexpressing cell lines

| **Hepatic uptake transporter** | **OATP1B1** | **OATP1B3** | **Reference** |
| --- | --- | --- | --- |
| Expression in HEK293-OATP1B1 cells (fmol/µg mem protein) | 59.8 | BLOQa | Provided by Solvo Biotechnologyb |
| Expression in HEK293-OATP1B3 cells (fmol/µg mem protein) | BLOQ | 1.53 |
| Expression in hepatocyte  (fmol/µg mem protein) | 5.4 ± 1.2 | 4.3 ± 0.3 | The expression levels were obtained from Schaefer *et al*., 2012c and calculated mean values from all three donors were used here. |

a BLOQ, below the limit of quantification

b Proteinomics data of HEK293-OATP1B1/1B3 was provided by Solvo Biotechnology; the proteinomics was done following plasma membrane extraction reported by Prasad *et al*. (2016) Ontogeny of Hepatic Drug Transporters as Quantified by LC-MS/MS Proteomics. *Clin Pharmacol Ther* **100**: 362-370.

c The data (shown as mean ± SD of data from three donors) for OATP1B1 and OATP1B3 expression level on human hepatocytes was obtained from Olaf Schaefer, *et al*. (2012) Absolute Quantification and Differential Expression of Drug Transporters, Cytochrome P450 Enzymes, and UDP-Glucuronosyltransferases in Cultured Primary Human Hepatocytes. *Drug Metab Dispos* **40**: 93-103.
